# Supplementary material for: Shape-dependent photocatalytic hydrogen evolution activity over a Pt nanoparticle coupled g-C3N4 photocatalyst
Source: Royal Society of Chemistry journal article supplement (doi:10.1039/c6cp02832b), 2016-01-01
Supplement: c6cp02832b1.pdf [file c6cp02832b1.pdf]

## Supplementary Information

### Shape-dependent photocatalytic hydrogen evolution activity over Pt nanoparticles coupled g-C<sub>3</sub>N<sub>4</sub> photocatalyst

Shaowen Cao,<sup>a</sup> Jing Jiang,<sup>a</sup> Bicheng Zhu,<sup>a</sup> and Jiaguo Yu<sup>\*ab</sup>

*<sup>a</sup>State Key Laboratory of Advanced Technology for Materials Synthesis and Processing, Wuhan University of Technology, 122 Luoshi Road, Wuhan 430070, P. R. China*

*<sup>b</sup>Faculty of Science, King Abdulaziz University, Jeddah 21589, Saudi Arabia*

*E-mail: jiaguoyu@yahoo.com; Fax: 0086-27-87879468; Tel.: 0086-27-8787102*

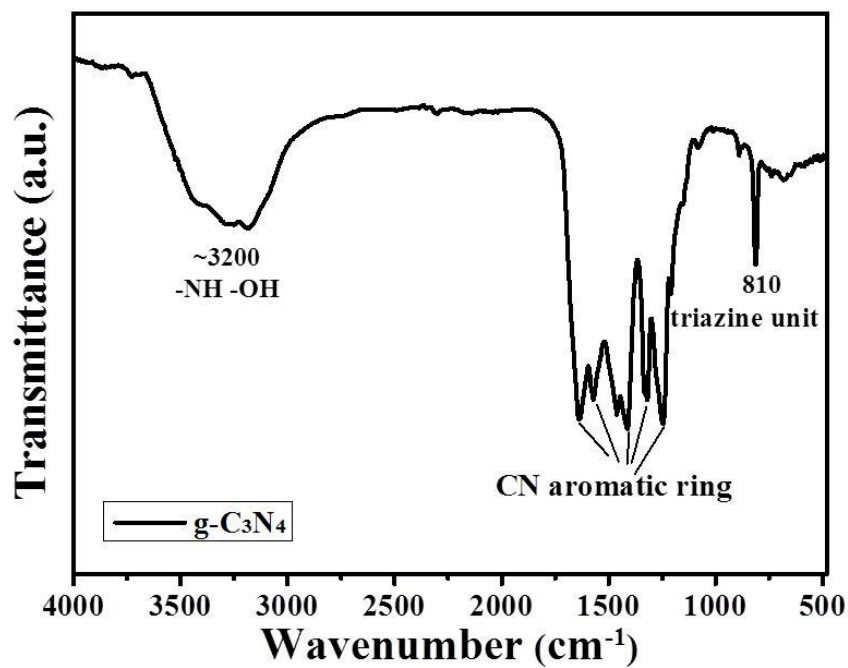

**Fig. S1** Fourier transform infrared spectrum of g-C<sub>3</sub>N<sub>4</sub> sample.

**Table S1** Atomic ratio of g-C<sub>3</sub>N<sub>4</sub> from elemental analysis (a) and XPS spectrum (b).

| sample                          | C/N <sup>a</sup> | C/N <sup>b</sup> |
|---------------------------------|------------------|------------------|
| g-C <sub>3</sub> N <sub>4</sub> | 0.693            | 0.714            |

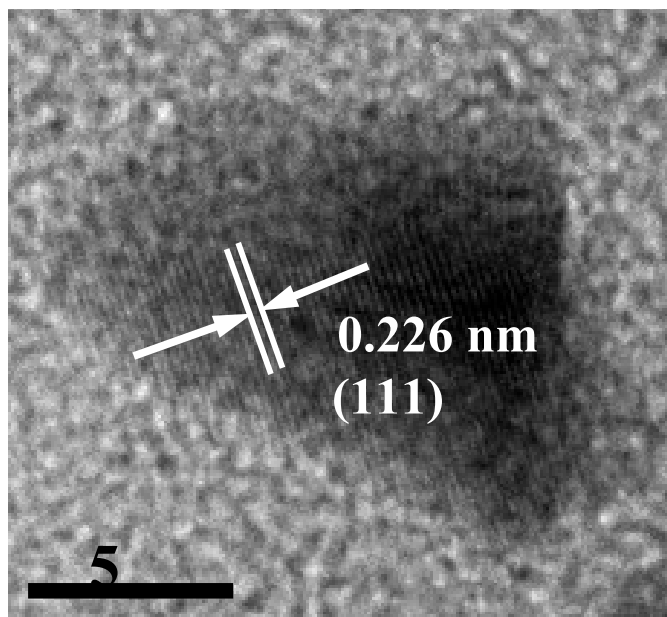

**Fig. S2** HRTEM image of triangle-like Pt nanoparticles (tetrahedron).
